38

## 39 **1. Introduction**

40 Photosensitive epilepsy (PSE) affects 5% of epilepsy patients worldwide, with a high prevalence in females,  
41 children, and adolescents (Fisher et al., 2022; Martins da Silva & Leal, 2017). It is diagnosed via the  
42 Intermittent Photic Stimulation procedure (IPS) under concurrent Electroencephalography (EEG)  
43 monitoring (Kasteleijn-Nolst Trenité et al., 2012). The IPS delivers white flashes of light that evoke transient  
44 visually evoked potentials (tVEP) for lower and steady-state visual evoked potentials (ssVEP) for higher  
45 stimulation frequencies. Both the tVEP and the ssVEP are normal physiological reactions, time-locked to  
46 the stimulus and linked to the triggering frequency (Herrmann, 2001). However, stimulation frequencies  
47 specific to PSE patients, mainly between 15 and 20 Hz, can induce abnormal EEG activity, characterized by  
48 3-4 Hz spikes or spike-slow wave complexes, called the photoparoxysmal response (PPR) (Fisher et al.,  
49 2005; Harding & Harding, 2010; Kasteleijn-Nolst Trenité et al., 2012; Taoufiqi et al., 2016). Based on the  
50 propagation of the PPR, PSE can be further categorized into four different types ranging from least to most  
51 severe (Type 1-4) (Waltz et al., 1992). Photosensitivity occurs mainly in genetic (idiopathic) generalized  
52 epilepsies (GGE) but also in focal idiopathic photosensitive occipital epilepsy (IPOE) and has a high  
53 prevalence in certain generalized epilepsy syndromes such as juvenile myoclonic epilepsy (JME) or juvenile  
54 absence epilepsy (JAE) (Guerrini & Genton, 2004; Martins da Silva & Leal, 2017; Taylo et al., 2013). Both  
55 focal (occipital) and generalized (whole brain) network effects have been hypothesized and investigated  
56 as the driving mechanism of PSE (Brinciotti et al., 2020a; Moeller et al., 2013; Strigaro et al., 2012; Varotto  
57 et al., 2012).

58 Previous studies in PSE have revealed increased amplitude of the occipital tVEP, the so-called P100, in  
59 response to single- and paired flashes compared to healthy controls (HC) (Brinciotti et al., 2020; Strigaro  
60 et al., 2012). It was suggested that augmentation of the P100 amplitude indicates a focal  
61 hypersynchronization of the occipital cortex, potentially leading to hyperexcitability and seizures (Wilkins  
62 et al., 2004). Further indication of a hyperexcited visual cortex associated with PPR was shown in a study  
63 using transcranial magnetic stimulation that found lower phosphene thresholds in individuals with PPR  
64 compared to those without (Siniatchkin et al., 2007a). Recent papers have also identified abnormal activity  
65 of specific EEG frequency bands in the visual cortex of PSE patients in the form of increased alpha and  
66 gamma oscillations, highlighting its altered excitatory and inhibitory processes (Hermes et al., 2017;  
67 Vaudano et al., 2017).

68 While the focal hyperexcitability of the visual cortex has been associated with PSE, the extent to which it  
69 is causally involved in generating and propagating the PPR is still debatable. Moeller et al. (2009a) found  
70 that during a PPR, blood oxygen level-dependent (BOLD) responses increased in the occipital cortex of PSE  
71 patients, however, similar increases were observed in the parietal and frontal regions. In a later study,  
72 Moeller et al. (2013) proposed that PPR is a cortical phenomenon and modeled the general network of its  
73 propagation to involve occipital, parietal, and frontal areas. Similarly, a connectivity study in the EEG-  
74 gamma band during photic stimulation pointed towards hyperconnectivity as the facilitator of the PPR.  
75 They showed higher anterior functional connectivity, suggesting that the PPR might depend on  
76 hyperconnected frontal regions (Varotto et al., 2012). These findings indicate that the hyperexcitability of  
77 the visual cortex is a concomitant rather than the primary driver of the PPR and that network-based effects  
78 are responsible for PSE.

79 Here, we aimed to solidify the role of the network in PSE and to provide a more detailed understanding of  
80 its underlying dynamics. We retrospectively analyzed scalp EEG recordings under IPS stimulation of PSE  
81 patients (Type 2, Type 3, and Type 4), non-PSE epilepsy patients (PWE), and healthy controls (HC). We  
82 assessed the activation of the visual cortex by analyzing the physiological (P100 and ssVEP) and  
83 pathological (PPR) response patterns in reaction to IPS. Additionally, the propagation characteristics of the  
84 PPR were investigated by evaluating the functional connectivity (FC) in the low-frequency band (3-4 Hz),  
85 where pathological activity occurs but so far remained unexplored.

86

## 87 **2. Methods & Materials**

88 Our aims for the present study were to (i) characterize type- and stimulation frequency-specific PPR  
89 activity in PSE groups, (ii) directly assess and compare the activity of the visual cortex in response to IPS in  
90 PSE, non-PSE, and HC groups, (iii) map dynamic FC patterns of PSE patients in response to high-risk  
91 stimulation frequencies in the PPR band.

### 92 **2.1 Study populations**

93 We retrospectively reviewed a large cohort of epilepsy patients and healthy participants (HC) who  
94 underwent a routine EEG recording at the Swiss Epilepsy Center. All participants were stimulated with IPS  
95 under EEG monitoring along standardized protocols according to the International Federation of Clinical  
96 Neurophysiology (IFCN) guidelines (Peltola et al., 2022). Recordings were carried out as routine EEG  
97 patient follow-ups and as occupational fitness assessments for the HC. Two blinded independent medical  
98 professionals evaluated the encrypted EEG recordings and determined the PSE Type (2, 3, or 4) or lack  
99 thereof (PWE). A third medical professional provided the final classification in case of differing  
100 classification. The patients' epilepsy syndromes were categorized based on the International League of  
101 Epilepsy (ILAE) criteria (Berg et al., 2010; Hirsch et al., 2022), into genetic generalized (GGE), focal (FE:  
102 structural, non-structural or unknown), combined (CM: generalized and focal) or epilepsy of unknown  
103 origin (UC).

104 We selected 45 PSE patients who fulfilled the criteria of Type 2 ( $n = 11$ ; mean age  $29.5 \pm 16.5$ , 10 females),  
105 Type 3 ( $n = 14$ ; mean age  $22.8 \pm 12.9$ , 12 females), or Type 4 ( $n = 20$ ; mean age  $21.1 \pm 8.6$ , 19 females).  
106 Photosensitivity was determined by the observation of the PPR under IPS stimulation. Occipital spikes and  
107 slow waves with parietal propagation were categorized as Type 2, parieto-occipital spikes and slow waves  
108 with spread to the frontal regions as Type 3, and generalized spike and wave complexes as Type 4 (Waltz  
109 et al., 1992). Type 1 patients were excluded due to frequent ambiguity with PSE Type 2.

110 We also recruited 19 non-PSE patients with epilepsy (PWE, mean age  $22.2 \pm 8.7$ , 15 females) and 20 healthy  
111 individuals (HC,  $21 \pm 2.7$ , 3 females) as control groups. The PWE group consisted of epilepsy patients who,  
112 under IPS stimulation, exhibited no PPR nor sensitivity upon eye closure, indicating no photosensitivity.  
113 Finally, individuals of the HC group exhibited no PPR under IPS stimulation nor sensitivity upon eye closure  
114 and had no current or history of epilepsy. Additionally, the participants in this group took no CNS active  
115 medication nor had cognitive deficits. For the categorization of the patients' (PSE, PWE) epilepsy  
116 syndromes and ASM intake, refer to Table 1.

117 All subjects' consent was obtained according to the Declaration of Helsinki and was approved by the local  
118 ethical committee (Kantonale Ethikkommission, KEK Zurich, KEK number 2024-00401).

## 119 **2.2 EEG recording**

120 EEG was recorded with 23 sintered Ag/AgCl scalp EEG electrodes under the 10-20 system with a low-pass  
121 filter of 70 Hz. An additional pericentral electrode was used as reference located close to Cz. Electrode  
122 impedance was kept between 2-5 K $\Omega$ . For most participants (n=73), the recordings were captured with the  
123 NicOne System (NicoletOne™ 44 channel amplifier, Natus, United States) or with the Micromed  
124 Ambulatory System (Micromed® Evolution Plus, 40 channels). The sampling frequency was 256 Hz. EEG  
125 recordings were conducted in a suitably equipped room at the Swiss Epilepsy Center, Zürich, Switzerland.  
126 All participants were lying in a darkened room and completed an approximately 20-minute-long recording  
127 with three conditions: resting state (with eyes closed and eyes open), hyperventilation, and IPS (with eyes  
128 closed and eyes open). An EEG specialist verbally instructed eye closure and opening, as well as the rate  
129 of hyperventilation. During classification, the whole recording was evaluated. However, the analysis in this  
130 present study only considered the IPS condition. The IPS stimuli were delivered in four different sections  
131 according to IFCN guidelines (Peltola et al., 2022). The participants' physical state and EEG recording were  
132 constantly monitored by the EEG specialists present. IPS was stopped after observing a PPR response or at  
133 the participant's request.

## 134 **2.3 EEG signal preprocessing steps**

135 EEGs recorded with the Nicone System were reviewed with Study Room (NicoletOne LTM version 5.95.0.2)  
136 and exported in .edf format, while EEGs recorded with Micromed were reviewed with Brain Quick (System  
137 Plus Software version 1.02.0002). For further analysis, 19 channel EEG recordings were loaded with Python  
138 (version 3.12) (Python Software Foundation) from .edf or .trc formats, respectively. We applied a high-  
139 pass filter of 0.01 Hz to remove baseline wander or drift caused by movement, respiration, or some  
140 impedance changes of the electrode. This chosen cutoff frequency also allowed us to observe activity  
141 following a stimulation frequency of 1 Hz. Notch filters were used to filter out line noise at 50 Hz. The  
142 average of all electrodes served as a reference for all further analyses. Triggers linked to the IPS stimulation  
143 carried annotations on the exact stimulation frequencies given throughout the EEG recording. The  
144 following stimulation frequencies were consistently recorded for all included individuals: 1Hz, 5Hz, 10 Hz,  
145 15 Hz, 20 Hz, and 25 Hz. Hence, our analyses considered responses to these five conditions.

## 147 **2.4 Visual Evoked Potentials (P100)**

148  
149 We calculated the transient visual evoked potentials (tVEP) for the 1Hz condition by creating 1s epochs,  
150 500 ms before and after every single stimulus, and averaging those for each individual. Automatic rejection  
151 of epochs with amplitude greater than +/- 100  $\mu$ V was applied to reduce artifacts and interferences related  
152 to the PPR (Brinciotti et al., 2020). Based on this, two recordings (one Type 4 and one PWE) were excluded  
153 from this analysis. The tVEP has two main parts: the main complex, the positive peak (P100), and the after-  
154 discharge (Strigaro et al., 2012). In previous studies, the amplitude of the P100 showed significant  
155 differences between PSE and non-PSE participants (Brinciotti et al., 2020; Siniatchkin et al., 2007b; Strigaro  
156 et al., 2012). Hence, we calculated the peak-to-peak amplitude of the P100 wave and its latency as an  
157 additional measure. For group comparisons, we estimated grand averages of the P100; however, for  
158 statistical analysis, we considered the individual amplitude and latency values. In nine patients (five Type

159 4, two Type 3, and one Type 2), 1 Hz stimulation was unavailable (i.e., not recorded). Hence, these  
160 individuals were not included at this stage of the analysis.

161

## 162 **2.5 Power Spectral Density**

163 Power spectral densities (PSD) were calculated on recording segments in response to the remaining  
164 stimulation frequencies (5Hz, 10Hz, 15Hz, 20Hz, and 25Hz). We used the fast Fourier transformation (FFT)  
165 with a 2s window size, which provided PSD values in a frequency window of 0-60 Hz in bins of 0.5 Hz. We  
166 computed PSD at occipital (O1 and O2 averaged), parietal (P3, P4, Pz averaged; in supplementary material),  
167 and at frontal electrodes (F3, F4, Fz averaged; in supplementary material) for every individual since these  
168 were previously shown to be affected by PPR (Moeller, et al., 2009a).

169 For each stimulation frequency, spectral power at the fundamental ssVEP band (i.e., the narrow band  
170 corresponding to the stimulation frequency) was calculated by the sum of EEG power at three bins  
171 respective to the stimulation frequency (4.5-5.5 Hz, 9.5-10.5 Hz, 14.5-15.5 Hz, 19.5-20.5 Hz, 24.5-25.5 Hz)  
172 and multiplying that by 0.5 (bin size), resulting in a total power value. The same calculation was done for  
173 each stimulation frequency to estimate PPR power, except here, we summed the EEG power in the three  
174 bins of the PPR frequency band of 3-4 Hz (3 Hz, 3.5 Hz, and 4 Hz).

175 There were three patients without a 25 Hz recording (two Type 4, one Type 2) and one Type 2 patient  
176 without a 5 Hz recording. Hence, these patients were excluded from this part of the analysis.

## 177 **2.6 Scalp-scalp Functional Connectivity**

178 FC responses to the stimulation frequencies of interest (5Hz-25Hz) were measured by calculating the Phase  
179 Locking Value (PLV) with the same segmentation parameters as for the PSD analysis. PLV is suitable for  
180 investigating task-induced changes measuring connectivity by estimating the phase-locking consistency of  
181 two signals across multiple trials, i.e., whether two signals systematically rise and fall together (Cui et al.,  
182 2023). The frequency band of interest for investigating FC changes was the PPR band (3-4 Hz). PLV was  
183 calculated between all channels, and to gain more regional dependent measures, we calculated it region-  
184 wise by averaging the corresponding electrodes together. The regions included: Fronto-polar (Fp): Fp1,  
185 Fp2; Fronto-central (Fc): F3, F4, Fz; Fronto-temporal (Ft): F7, F8; Central (C): C3, C4, Cz; Temporal (T): T3,  
186 T4, T5, T6; Parietal (P): P3, P4, Pz; Occipital (O): O1, O2. The same 4 patients excluded from the PSD analysis  
187 (under section 2.5) due to missing recordings were also excluded from this analysis.

## 188 **2.7 Statistical analysis**

189 All analyses and statistical tests were carried out in Python 3.12 (Python Software Foundation). Our data  
190 showed unequal variances and was not normally distributed. Hence, for all comparisons between groups,  
191 we used robust permutation tests. Permutation tests can be applied to non-normally distributed data and  
192 control for family-wise error rates for comparisons in multidimensional data, making them well-suited for  
193 FC calculations channel- and region-wise (Smith & Nicols 2008; Rempala & Yang 2013). We used the  
194 difference between sample means as test statistics, with 1000 permutations generated with random  
195 resampling. Bonferroni correction was applied to correct for multiple comparisons between groups. All  
196 statistical tests were independent and two-sided. The level of significance was set at  $p < 0.05$ . 95 % CI was  
197 calculated for significant differences with Bootstrapping along the exact specifications as the permutation  
198 test.

## 199 **3. Results**

### 200 **3.1 Study cohorts**

201 A total of 84 participants were included in this analysis. Our cohort includes children and adults and is  
202 predominantly female (Table 1) since PSE is more prevalent in females, children, and adolescents (Fisher  
203 et al., 2022). Importantly, we found no significant age difference between any of our groups (all  $p > 1.0$ ).

### 204 **3.2. Visual evoked potentials (P100)**

205 First, to characterize the general reactivity of the primary visual cortex to photic stimulation, we measured  
206 the P100. The latency of the P100 showed no significant differences between PSE patients and HC (all  $p >$   
207  $0.119$ ), in line with previous findings (Brinciotti et al., 2020; Siniatchkin et al., 2007b). The PWE group did,  
208 however, exhibit a significantly larger latency compared to HC ( $p = 0.008$ ,  $CI_{95} = [-29.632, -12.067]$ ) (Figure  
209 1A&B). Contrary to the previous literature, the P100 (peak-to-peak) amplitude showed no significant  
210 differences between HC and either of the patient groups (PWE or PSE) (all  $p > 0.152$ ) (Figure 1A&B). Overall,  
211 we observed no significant P100 amplitude or latency alterations in PSE patients compared to control  
212 subjects.

213

### 214 **3.3 Steady-state visual evoked potentials and Photoparoxysmal responses**

215 Next, we analyzed the occipital ssVEP in response to higher temporal frequencies to further investigate  
216 the reactivity of the primary visual cortex (Porciatti et al., 2000). This was assessed at the fundamental  
217 frequency band, corresponding to the narrow band around the stimulation frequency. The fundamental  
218 ssVEP power increased significantly in the PSE Type 4 group, compared to HC for stimulation frequencies  
219 5 Hz, 15 Hz, and 20 Hz. However, this remained unchanged in Types 3 and 2 PSE patients (Figure 1C;  
220 Supplementary Table 1). We also observed a significantly increased ssVEP power in PWE compared to HC  
221 for stimulation frequency 5 Hz (Figure 1C; Supplementary Table 1). No further differences were found  
222 when comparing PWE to HC (Figure 1C) or to any of the PSE groups (Supplementary Section 3.1). Additional  
223 comparisons between PSE patients revealed a significant ssVEP power increase for stimulation frequency  
224 of 10 Hz in Type 4 compared to the other PSE groups (Supplementary Section 3.2.).

225 To characterize the epileptic activity of PSE patients, we analyzed the occipital PPR power in response to  
226 the same temporal frequencies as for ssVEP. As expected, the PPR power increased significantly in all PSE  
227 patients compared to HC (Figure 2A; Supplementary Table 1), with the highest values observed for  
228 stimulation frequencies between 10-20 Hz (Figure 2B). The peak group power within the established 10-  
229 20 Hz risk range was noted for different stimulation frequencies (15 Hz for Type 2 and 3; and 10 Hz for  
230 Type 4 patients). PPR power increased with type severity, showing the highest values in Type 4 followed  
231 by Type 3 (Figure 2A&B, Table 2). The effect of type severity was further evidenced by Type 4 reaching  
232 significantly larger occipital PPR power compared to the other PSE groups for stimulation frequencies 10-  
233 25 Hz (Supplementary Section 4.1.). For the same stimulation frequencies, Type 4 also showed significantly  
234 higher occipital PPR power compared to PWE (Supplementary Section 4.2.). Surprisingly, PWE exhibited  
235 significantly higher PPR power compared to HC for stimulation frequencies 20 Hz and 25 Hz (Figure 2A;  
236 Supplementary Table 1). However, we do not consider this an actual PPR activity since PWE showed a rise  
237 in power unspecific to a frequency band (between 1-15Hz), concurrent with the HC group showing a slight  
238 decline in power in response to these stimulation frequencies. Together, these most likely facilitated the



239 significant difference. Lastly, all the above-described occipital PPR power patterns similarly emerged at  
240 parietal and frontal electrodes (Supplementary Sections 5 & 6).

241 In summary, Type 4 patients showed increased occipital ssVEP power at the fundamental frequency band  
242 compared to HC but revealed no difference when measured against PWE. Spectral power in the PPR band  
243 exhibited an increase governed by type severity at the occipital, as well as parietal and frontal electrodes.  
244 The highest PPR power appeared in Type 3 and 4 PSE groups, specifically for stimulation frequencies 10 -  
245 20 Hz (Figure 2A & B).

246

### 247 **3.4 Scalp-scalp Connectivity**

248 Finally, functional network effects were explored by analyzing FC patterns in the 3-4Hz frequency band  
249 (PPR band) in response to stimulation frequencies 5-25 Hz. We identified only a few decreased FC  
250 (hypoconnected) patterns in PWE compared to HC. These hypoconnected FC patterns were found  
251 between central and frontotemporal regions for stimulation frequencies 5 and 20 Hz and between  
252 temporal and occipital regions for stimulation frequencies 10 Hz (Figure 3). In contrast, different FC  
253 patterns in PSE patients compared to HC were apparent for risk range frequencies (10-20 Hz) established  
254 in our PSD analysis. We observed significant hyper- and hypoconnectivity patterns in PSE patients  
255 compared to HC, governed by type severity and stimulation frequency. The most prominent patterns of  
256 decreased FC in all PSE patients were shown for stimulation frequencies 10-25 Hz between central and  
257 parietal regions and between central and frontopolar regions (Figure 3; Supplementary Table 2). This  
258 centro-parietal and centro-frontopolar hypoconnectivity was less pronounced when comparing PSE  
259 patients to PWE (Supplementary Section 7 & Figure 3). Increased FC (hyperconnectivity) patterns were  
260 only observed in patients with PPR propagation, i.e., in Types 3 and 4. These were subtle in Type 3, with a  
261 slight FC increase between frontal electrodes and between occipital and frontal channels (Figure 3).  
262 Hyperconnectivity became quite prominent in Type 4, specifically between frontocentral and frontopolar  
263 and between occipital and frontocentral regions for stimulation frequencies 10-20 Hz (Figure 3;  
264 Supplementary Table 3). Significantly increased within-anterior and between-posterior-anterior FC  
265 seemed to be even more evident in Types 3 and 4 compared to PWE (Supplementary Section 7 & Figure  
266 3).

267 In brief, we showed FC differences in PSE patients' responses to IPS compared to control subjects. These  
268 involved hypoconnected centro-parietal and centro-frontopolar areas in all PSE types and hyperconnected  
269 frontal occipito-frontal connectivity in PSE patients with PPR propagation.

270

## 271 **4. Discussion**

272

273 We examined the underlying mechanisms of type-specific PSE responses using IPS and scalp EEG, aiming  
274 to provide a comprehensive, systematic analysis of PSE and reveal new insights into the underlying  
275 mechanisms of the condition. To date, multiple studies have investigated PSE and the hyperexcitability of  
276 the visual cortex (Brinciotti et al., 2020; Siniatchkin et al., 2007a,b; Strigaro et al., 2012; Wilkins et al.,  
277 2004). However, possible network differences driving the propagation of the PPR have yet to be  
278 investigated in detail. In this present study, we observed that PPR activity was affected by both type  
279 severity and stimulation frequency. However, hyperexcitability of the visual cortex was only apparent in

280 Type 4 patients, posing the question to what extent this can be responsible for the generation and, more  
281 importantly, the propagation of the PPR. The altered FC profiles in Type 3 and Type 4 PSE patients suggest  
282 that large-scale network alterations could underlie PSE and the propagation of the PPR.

283  
284 Our results show evident pathological activity (PPR) at occipital electrodes in PSE patients, with  
285 significantly enhanced PPR EEG power compared to HC. The occipital PPR power was affected by  
286 stimulation frequency, with the highest values shown for the range of 10-20 Hz, in line with previous  
287 studies, and by type severity, with Type 4 showing the highest PPR power (Harding & Harding, 2010;  
288 Kasteleijn-Nolst Trenité et al., 2012; Porciatti et al., 2000; Taoufiqi et al., 2016; Zhang et al., 2023). As part  
289 of a supplementary analysis, we identified similar patterns at parietal and frontal channels, which further  
290 solidifies the involvement of these two areas in PPR propagation, as previously suggested by Moeller et al.  
291 (2013; 2009a).

292 Unlike prior studies, we did not observe an increased P100 amplitude in PSE patients, which was previously  
293 proposed as an indication of the hyperexcitability of the visual cortex and key to the PSE reaction.  
294 (Brinciotti et al., 2020; Genç et al., 2005; Siniatchkin et al., 2007b). Albeit not significant, we showed trends  
295 for the highest P100 amplitudes in Type 4 and lowest in the HC group, similar to previous findings using  
296 single flashes (Strigaro et al., 2012). Interestingly, a trend for increased P100 amplitude also arose in PWE  
297 compared to HC. Although PWE individuals are not photosensitive, their responses could deviate from  
298 those of the HC due to underlying neurological differences. The latency of the P100 only showed a  
299 significant increase in PWE compared to HC, which is not unprecedented (Genç et al., 2005). Several factors  
300 can account for prolonged latency in these patients, such as ASMs (Geller et al., 2005; Verrotti et al., 2000),  
301 abnormal synaptic transmission (Gokcay et al., 2003; Mervaala et al., 1987), or minor changes in underlying  
302 neurophysiologic structures (microdysgenesis) (Meencke & Janz, 1985), many of which could also apply to  
303 the PWE group.

304 The occipital ssVEP power, however, did increase significantly at the fundamental frequency band in Type  
305 4 compared to HC in line with Poricatti et al. (2000). This provides evidence that PSE patients have  
306 heightened occipital activity in response to ongoing visual stimulation, which we only found a trend for in  
307 the P100 analysis. The fact that ssVEP power only increased in Type 4 compared to HC agrees with the  
308 study of Siniatchkin et al. (2007b), which observed higher VEP amplitudes in patients with propagating  
309 PPRs compared to patients with more local PPRs. The ssVEP power also increased in PWE compared to HC,  
310 although for only stimulation frequency 5 Hz. Such a ssVEP power increase argues for increased neuronal  
311 excitability in the visual cortex of not only the PSE but also non-PSE epilepsy patients compared to HC. The  
312 absence of a significant ssVEP power difference between PWE and the PSE groups further supports this  
313 claim. Together, these findings suggest that PSE patients do show hyperexcitability in the visual cortex to  
314 external visual stimulation, also shown by previous papers (Brinciotti et al., 2020b; Moeller et al., 2009a;  
315 Siniatchkin et al., 2007b; Strigaro et al., 2012). However, in our study, this local effect was small and not  
316 significantly different from those in PWE. Hence, a hyperexcitable visual cortex might be a requirement  
317 for PPR, however, it most likely must be coupled with other factors to generate and propagate the  
318 pathological response of PSE patients. This aligns with a study by Moeller et al. (2009a), which showed  
319 that in PSE patients, PPR was associated with activity in frontal and parietal regions, suggesting that the  
320 PPR depends on network differences rather than overactivity of the occipital cortex alone. Another study  
321 found higher visual cortex activation in HC compared to PSE patients during IPS, which could support the



322 notion that a hyperexcited visual cortex in itself is insufficient to trigger pathological activity (Bartolini et  
323 al., 2014), and instead, it might depend on functional network dynamics (Varotto et al., 2012).

324 Our FC results corroborate this hypothesis, showing significantly different connectivity patterns observed  
325 in PSE patients compared to HC and to PWE in response to stimulation at high-risk frequencies (10-20 Hz).  
326 We argue that these pathological hypo- and hyperconnectivity alterations drive the PPR and are  
327 responsible for its propagation.

328 All PSE patients demonstrated hypoconnectivity between central and parietal, central and frontopolar,  
329 and central and frontotemporal regions when compared to HC. We infer that these subnetworks likely  
330 correspond to the default mode network (DMN), a collection of regions active when the brain is at rest  
331 and not engaged in an activity. It includes the frontal central and parietal areas with the ventral and dorsal  
332 medial prefrontal cortex, posterior cingulate cortex, and lateral parietal cortex (Raichle, 2015). The DMN  
333 was previously shown to decrease its activity in PSE patients and to further decrease during PPR (Bartolini  
334 et al., 2014; Moeller, et al., 2009b). Resting-state DMN hypoconnectivity was also shown to accompany  
335 multiple epilepsy syndromes (Gonen et al., 2020; Luo et al., 2011; McGill et al., 2012; Parsons et al., 2020).  
336 Hence, it is not surprising that PWE shows some minimal hypoconnectivity between DMN-related areas  
337 compared to HC. The fact that PWE also exhibited some hypoconnectivity in the DMN could account for  
338 less pronounced hypoconnectivity differences when compared to PSE patients. Furthermore, decreased  
339 connectivity between DMN regions was suggested to facilitate hyperconnectivity between other areas  
340 (Vollmar et al., 2012), which could fit our observations of several hyperconnected electrodes with  
341 concurrent hypoconnectivity in the inferred DMN regions (Figure 3).

342 As the severity of the PSE type increased, hyperconnectivity became more evident, demonstrated by  
343 increasingly widespread patterns compared to HC. While hypoconnectivity was observed in all PSE  
344 patients, hyperconnectivity only characterized those with PPR propagation in response to the high-risk  
345 stimulation frequencies. Type 3 patients showed some abnormal connectivity of the posterior regions and  
346 a slight increase in FC between occipital and frontal electrodes and between frontal electrodes. Type 4  
347 patients with generalized PPR had quite a clear posterior-anterior connectivity, the directionality of which  
348 was modeled in a study by Moeller et al. (2013), and within anterior hyperconnectivity. The increased  
349 anterior connectivity agrees with findings from Varotto et al. (2012) who found hyperconnectivity within  
350 anterior regions of PSE patients compared to HC. Increased synchronization of frontoparietal networks  
351 was also associated with PPR in a study on baboons (Szabo et al., 2016). In a supplementary analysis,  
352 hyperconnectivity patterns in Type 3 and 4 seemed to be enhanced compared to PWE, as opposed to when  
353 these groups were contrasted with HC, particularly in Type 3, where hyperconnectivity was much more  
354 evident. Our ssVEP analysis indicated that, in general, epilepsy patients might have higher local  
355 susceptibility to visual stimuli independent from PSE. It could be that, as a protective mechanism, in PWE,  
356 these areas (anterior regions and posterior-anterior regions) are less connected to prevent a PPR from  
357 occurring.

358

359

360

361

362

363

#### 364 **4.1.1 Limitations and outlook**

365  
366 There is a possibility that the lack of a significant P100 amplitude increase in all patient groups compared  
367 to HC may be due to ASM intake. However, this remains debatable, as some studies have reported reduced  
368 VEP amplitude in patients taking ASM (Geller et al., 2005; Kanazawa & Nagafuji, 1997), while others claim  
369 that it only affects the latency rather than the amplitude of the P100 (Verrotti et al., 2000; Yüksel et al.,  
370 1995). Another limitation we must address is the sex imbalance between the HC group (mostly male) and  
371 the patient groups (mostly female). It has been shown that generally, females have higher ssVEP  
372 amplitudes compared to males (Krishnan et al., 2005; Skosnik et al., 2006). In this present study, we cannot  
373 entirely exclude whether the significant ssVEP power increase in patient groups was only due to sex  
374 differences or due to a combination of sex and photosensitivity effects. However, we consider the former  
375 unlikely since we observed variability in the ssVEP power governed by stimulation frequency and type  
376 severity, as evidenced by only Type 4 patients showing significant differences compared to HC. Regarding  
377 FC analyses, we noted minimal distinctions between PWE and HC. Since PWE and PSE groups are similar  
378 in sex distribution, this indicates that the variations in FC between PSE patients and HC were  
379 predominantly influenced by PSE type, the presence of PPR, and the stimulation frequency rather than sex  
380 differences. Finally, in the present study, the analyzed FC patterns were restricted only to responses to  
381 periodically flashing lights. In the future, functional network alterations could also be studied in reaction  
382 to a variety of visual triggers that better represent real-life environments, e.g., stimuli of periodically  
383 varying chromaticity or stimuli of differing field size.

384

#### 385 **5. Conclusions**

386  
387 Overall, the results of our retrospective study suggest that the visual cortex of PSE patients is  
388 hyperexcitable and remains significantly more active during higher stimulation frequencies of the IPS  
389 compared to HC. Furthermore, we showed that PSE-type severity increases the magnitude of the PPR at  
390 occipital, parietal, and frontal electrodes. However, the hyperexcitability of the cortex is not the only  
391 determinant of PPR and PSE in general, as we did not observe increased activity in the occipital region of  
392 non-PSE patients compared to PSE patients. Instead, it appears that PPR relies on a hyperexcitable visual  
393 cortex, providing the basis for a local frequency-specific cortical overactivation and an altered brain  
394 network connectivity that propagates this overactivation in a type-specific manner.

395

396

#### 397 **Data availability**

398 Data and code for analysis will be made available upon reasonable request.

399

#### 400 **Disclosures**

401 No conflicts of interest, financial or otherwise, are declared by the authors.

402

#### 403 **Funding**

404 This study was supported by DRS Research Labs. L.T. L.I. and T.D. received support from the Swiss Epilepsy  
405 Foundation.

## 406 References

- 407
- 408 Bartolini, E., Pesaresi, I., Fabbri, S., Cecchi, P., Giorgi, F. S., Sartucci, F., Bonuccelli, U., & Cosottini, M.  
409 (2014). Abnormal response to photic stimulation in Juvenile Myoclonic Epilepsy: An EEG-fMRI  
410 study. *Epilepsia*, *55*(7), 1038–1047. <https://doi.org/10.1111/epi.12634>
- 411 Berg, A. T., Berkovic, S. F., Brodie, M. J., Buchhalter, J., Cross, J. H., Van Emde Boas, W., Engel, J., French,  
412 J., Glauser, T. A., Mathern, G. W., Moshé, S. L., Nordli, D., Plouin, P., & Scheffer, I. E. (2010). Revised  
413 terminology and concepts for organization of seizures and epilepsies: Report of the ILAE  
414 Commission on Classification and Terminology, 2005-2009. *Epilepsia*, *51*(4), 676–685.  
415 <https://doi.org/10.1111/j.1528-1167.2010.02522.x>
- 416 Brinciotti, M., Mittica, A., & Matricardi, M. (2020a). Characteristics of visual evoked potentials related to  
417 the electro-clinical expression of reflex seizures in photosensitive patients with idiopathic occipital  
418 lobe epilepsy. *Epilepsy Research*, *164*(March), 106345.  
419 <https://doi.org/10.1016/j.eplesyres.2020.106345>
- 420 Brinciotti, M., Mittica, A., & Matricardi, M. (2020b). Characteristics of visual evoked potentials related to  
421 the electro-clinical expression of reflex seizures in photosensitive patients with idiopathic occipital  
422 lobe epilepsy. *Epilepsy Research*, *164*(January), 106345.  
423 <https://doi.org/10.1016/j.eplesyres.2020.106345>
- 424 Cui, G., Li, X., & Touyama, H. (2023). Emotion recognition based on group phase locking value using  
425 convolutional neural network. *Scientific Reports*, *13*(1), 1–9. <https://doi.org/10.1038/s41598-023-30458-6>
- 426
- 427 Fisher, R. S., Acharya, J. N., Baumer, F. M., French, J. A., Parisi, P., Solodar, J. H., Szaflarski, J. P., Thio, L. L.,  
428 Tolchin, B., Wilkins, A. J., & Kasteleijn-Nolst Trenité, D. (2022). Visually sensitive seizures: An  
429 updated review by the Epilepsy Foundation. *Epilepsia*, *63*(4), 739–768.  
430 <https://doi.org/10.1111/epi.17175>
- 431 Fisher, R. S., Harding, G., Erba, G., Barkley, G. L., & Wilkins, A. (2005). Photic- and pattern-induced  
432 seizures: A review for the epilepsy foundation of america working group. *Epilepsia*, *46*(9), 1426–  
433 1441. <https://doi.org/10.1111/j.1528-1167.2005.31405.x>
- 434 Geller, A. M., Hudnell, H. K., Vaughn, B. V., Messenheimer, J. A., & Boyes, W. K. (2005). Epilepsy and  
435 medication effects on the pattern visual evoked potential. *Documenta Ophthalmologica*, *110*(1),  
436 121–131. <https://doi.org/10.1007/s10633-005-7350-0>
- 437 Genç, B. O., Genç, E., Güney, F., & İlhan, N. (2005). Pattern-reversal visual evoked potentials in patients  
438 with newly diagnosed epilepsy. *Epilepsia*, *46*(8), 1219–1223. <https://doi.org/10.1111/j.1528-1167.2005.63504.x>
- 439
- 440 Gokcay, A., Celebisoy, N., Gokcay, F., Ekmekci, O., & Ulku, A. (2003). Visual evoked potentials in children  
441 with occipital epilepsies. *Brain & Development*, *25*, 268–271. <https://doi.org/10.1016/S>
- 442 Gonen, O. M., Kwan, P., O'Brien, T. J., Lui, E., & Desmond, P. M. (2020). Resting-state functional MRI of  
443 the default mode network in epilepsy. *Epilepsy and Behavior*, *111*, 107308.  
444 <https://doi.org/10.1016/j.yebeh.2020.107308>
- 445 Guerrini, R., & Genton, P. (2004). Epileptic Syndromes and Visually Induced Seizures. *Epilepsia*, *45*(SUPPL.  
446 1), 14–18. <https://doi.org/10.1111/j.0013-9580.2004.451011.x>
- 447 Harding, G. F. A., & Harding, P. F. (2010). Photosensitive epilepsy and image safety. *Applied Ergonomics*,  
448 *41*(4), 504–508. <https://doi.org/10.1016/j.apergo.2008.08.005>
- 449 Hermes, D., Kasteleijn-Nolst Trenité, D. G. A., & Winawer, J. (2017). Gamma oscillations and  
450 photosensitive epilepsy. *Current Biology*, *27*(9), R336–R338.  
451 <https://doi.org/10.1016/j.cub.2017.03.076>
- 452 Herrmann, C. S. (2001). Human EEG responses to 1-100 Hz flicker: Resonance phenomena in visual cortex  
453 and their potential correlation to cognitive phenomena. *Experimental Brain Research*, *137*(3–4),

- 454 346–353. <https://doi.org/10.1007/s002210100682>
- 455 Hirsch, E., French, J., Scheffer, I. E., Bogacz, A., Alsaadi, T., Sperling, M. R., Abdulla, F., Zuberi, S. M.,  
456 Trinka, E., Specchio, N., Somerville, E., Samia, P., Riney, K., Nabbout, R., Jain, S., Wilmshurst, J. M.,  
457 Auvin, S., Wiebe, S., Perucca, E., ... Zhou, D. (2022). ILAE definition of the Idiopathic Generalized  
458 Epilepsy Syndromes: Position statement by the ILAE Task Force on Nosology and Definitions.  
459 *Epilepsia*, 63(6), 1475–1499. <https://doi.org/10.1111/epi.17236>
- 460 Kanazawa, O., & Nagafuji, H. (1997). Valproate lowered the amplitude of visual and somatosensory  
461 evoked potentials in two cases of untreated juvenile myoclonic epilepsy. *Psychiatry and Clinical  
462 Neurosciences*, 51(6), 425–429. <https://doi.org/10.1111/j.1440-1819.1997.tb02612.x>
- 463 Kasteleijn-Nolst Trenité, D., Rubboli, G., Hirsch, E., Martins Da Silva, A., Seri, S., Wilkins, A., Parra, J.,  
464 Covanis, A., Elia, M., Capovilla, G., Stephani, U., & Harding, G. (2012). Methodology of photic  
465 stimulation revisited: Updated European algorithm for visual stimulation in the EEG laboratory.  
466 *Epilepsia*, 53(1), 16–24. <https://doi.org/10.1111/j.1528-1167.2011.03319.x>
- 467 Krishnan, G. P., Vohs, J. L., Hetrick, W. P., Carroll, C. A., Shekhar, A., Bockbrader, M. A., & O'Donnell, B. F.  
468 (2005). Steady state visual evoked potential abnormalities in schizophrenia. *Clinical  
469 Neurophysiology*, 116(3), 614–624. <https://doi.org/10.1016/j.clinph.2004.09.016>
- 470 Luo, C., Li, Q., Lai, Y., Xia, Y., Qin, Y., Liao, W., Li, S., Zhou, D., Yao, D., & Gong, Q. (2011). Altered  
471 functional connectivity in default mode network in absence epilepsy: A resting-state fMRI study.  
472 *Human Brain Mapping*, 32(3), 438–449. <https://doi.org/10.1002/hbm.21034>
- 473 Martins da Silva, A., & Leal, B. (2017). Photosensitivity and epilepsy: Current concepts and perspectives—  
474 A narrative review. *Seizure*, 50, 209–218. <https://doi.org/10.1016/j.seizure.2017.04.001>
- 475 McGill, M. L., Devinsky, O., Kelly, C., Milham, M., Castellanos, F. X., Quinn, B. T., DuBois, J., Young, J. R.,  
476 Carlson, C., French, J., Kuzniecky, R., Halgren, E., & Thesen, T. (2012). Default mode network  
477 abnormalities in idiopathic generalized epilepsy. *Epilepsy and Behavior*, 23(3), 353–359.  
478 <https://doi.org/10.1016/j.yebeh.2012.01.013>
- 479 Meencke, H. J., & Janz, D. (1985). The Significance of Microdysgenesis in Primary Generalized Epilepsy:  
480 An Answer to the Considerations of Lyon and Gastaut. *Epilepsia*, 26(4), 368–371.  
481 <https://doi.org/10.1111/j.1528-1157.1985.tb05665.x>
- 482 Mervaala, E., Tapani, K., Tiihonen, P., & Riekkinen, P. (1987). The effects of carbamazepine and sodium  
483 valproate on SEPs and BAEPs. *Electroencephalography and Clinical Neurophysiology*, 475–478.
- 484 Moeller, F., Muthuraman, M., Stephani, U., Deuschl, G., Raethjen, J., & Siniatchkin, M. (2013).  
485 Representation and propagation of epileptic activity in absences and generalized photoparoxysmal  
486 responses. *Human Brain Mapping*, 34(8), 1896–1909. <https://doi.org/10.1002/hbm.22026>
- 487 Moeller, F., Siebner, H. R., Ahlgrim, N., Wolff, S., Muhle, H., Granert, O., Boor, R., Jansen, O., Gotman,  
488 J., Stephani, U., & Siniatchkin, M. (2009a). fMRI activation during spike and wave discharges evoked  
489 by photic stimulation. *NeuroImage*, 48(4), 682–695.  
490 <https://doi.org/10.1016/j.neuroimage.2009.07.019>
- 491 Moeller, F., Siebner, H. R., Wolff, S., Muhle, H., Granert, O., Jansen, O., Stephani, U., & Siniatchkin, M.  
492 (2009b). Mapping brain activity on the verge of a photically induced generalized tonic-clonic  
493 seizure. *Epilepsia*, 50(6), 1632–1637. <https://doi.org/10.1111/j.1528-1167.2009.02011.x>
- 494 Parsons, N., Bowden, S. C., Vogrin, S., & D'Souza, W. J. (2020). Default mode network dysfunction in  
495 idiopathic generalised epilepsy. *Epilepsy Research*, 159(December 2019), 106254.  
496 <https://doi.org/10.1016/j.eplepsyres.2019.106254>
- 497 Peltola, M. E., Leitinger, M., Halford, J. J., Vinayan, K. P., Kobayashi, K., Pressler, R. M., Mindruta, I.,  
498 Mayor, L. C., Lauronen, L., & Beniczky, S. (2022). Joint ILAE and IFCN minimum standards for  
499 recording routine and sleep EEG. *Draft Standard*, 1–40.
- 500 Porciatti, V., Bonanni, P., Fiorentini, A., & Guerrini, R. (2000). *Lack of cortical contrast gain control in  
501 human photosensitive epilepsy*. 259–263.
- 502 Python Software Foundation. (n.d.). *Python Language Reference, version 3.12* (Available at).

- 503 <http://www.python.org>
- 504 Raichle, M. E. (2015). The Brain's Default Mode Network. *Annual Review of Neuroscience*, 38, 433–447.
- 505 <https://doi.org/10.1146/annurev-neuro-071013-014030>
- 506 Siniatchkin, M., Groppa, S., Jerosch, B., Muhle, H., Kurth, C., Shepherd, A. J., Siebner, H., & Stephani, U.
- 507 (2007a). Spreading photoparoxysmal EEG response is associated with an abnormal cortical
- 508 excitability pattern. *Brain*, 130(1), 78–87. <https://doi.org/10.1093/brain/awl306>
- 509 Siniatchkin, M., Moeller, F., Shepherd, A., Siebner, H., & Stephani, U. (2007b). *Altered cortical visual*
- 510 *processing in individuals with a spreading photoparoxysmal EEG response*. 26(May), 529–536.
- 511 <https://doi.org/10.1111/j.1460-9568.2007.05658.x>
- 512 Skosnik, P. D., Krishnan, G. P., Vohs, J. L., & O'Donnell, B. F. (2006). The effect of cannabis use and gender
- 513 on the visual steady state evoked potential. *Clinical Neurophysiology*, 117(1), 144–156.
- 514 <https://doi.org/10.1016/j.clinph.2005.09.024>
- 515 Strigaro, G., Prandi, P., Varrasi, C., Monaco, F., & Cantello, R. (2012). Defective visual inhibition in
- 516 photosensitive idiopathic generalized epilepsy. *Epilepsia*, 53(4), 695–704.
- 517 <https://doi.org/10.1111/j.1528-1167.2012.03411.x>
- 518 Szabo, C. A., Salinas, F. S., Li, Ka., Franklin, C., Leland, M. M., Fox, P. T., Laird, A. R., & Narayana, S. (2016).
- 519 Modeling the effective connectivity of the visual network in healthy and photosensitive , epileptic
- 520 baboons. *Brain Struct. Funct.*, 221, 2023–2033. <https://doi.org/10.1007/s00429-015-1022-y>
- 521 Taoufiqi, F. Z., Mounach, J., Satte, A., Ouhabi, H., & Hessni, A. El. (2016). *IPS Interest in the EEG of*
- 522 *Patients after a Single Epileptic Seizure*. 2016. <https://doi.org/10.1155/2016/5050278>
- 523 Taylo, I., Berkovic, S. F., & Scheffer, I. E. (2013). Genetics of epilepsy syndromes in families with
- 524 photosensitivity. *Neurology*, 80(14), 1322–1329. <https://doi.org/10.1212/WNL.0b013e31828ab349>
- 525 Varotto, G., Visani, E., Canafoglia, L., Franceschetti, S., Avanzini, G., & Panzica, F. (2012). Enhanced
- 526 frontocentral EEG connectivity in photosensitive generalized epilepsies: A partial directed
- 527 coherence study. *Epilepsia*, 53(2), 359–367. <https://doi.org/10.1111/j.1528-1167.2011.03352.x>
- 528 Vaudano, A. E., Ruggieri, A., Avanzini, P., Gessaroli, G., Cantalupo, G., Coppola, A., Sisodiya, S. M., &
- 529 Meletti, S. (2017). Photosensitive epilepsy is associated with reduced inhibition of alpha rhythm
- 530 generating networks. *Brain*, 140(4), 981–997. <https://doi.org/10.1093/brain/awx009>
- 531 Verrotti, A., Trotta, D., Cutarella, R., Pascarella, R., Morgese, G., & Chiarelli, F. (2000). Effects of
- 532 antiepileptic drugs on evoked potentials in epileptic children. *Pediatric Neurology*, 23(5), 397–402.
- 533 [https://doi.org/10.1016/S0887-8994\(00\)00219-8](https://doi.org/10.1016/S0887-8994(00)00219-8)
- 534 Vollmar, C., O'Muircheartaigh, J., Symms, M. ., Barker, G. J., Thompson, P., Kumari, V., Stretton, J.,
- 535 Duncan, J. S., Richardson, M. P., & Koeppe, M. J. (2012). *Altered microstructural connectivity in*
- 536 *juvenile myoclonic epilepsy The missing link*. 1555–1559.
- 537 Waltz, S., Christen, H. J., & Dooze, H. (1992). The different patterns of the photoparoxysmal response - a
- 538 genetic study. *Electroencephalography and Clinical Neurophysiology*, 83(2), 138–145.
- 539 [https://doi.org/10.1016/0013-4694\(92\)90027-F](https://doi.org/10.1016/0013-4694(92)90027-F)
- 540 Wilkins, A. J., Bonanni, P., Porciatti, V., & Guerrini, R. (2004). Physiology of Human Photosensitivity.
- 541 *Epilepsia*, 45(SUPPL. 1), 7–13. <https://doi.org/10.1111/j.0013-9580.2004.451009.x>
- 542 YÜKSEL, A., ŞARSLAN, O., DEVRANOĞLU, K., DİRİCAN, A., HATTAT, N., CENANİ, A., & YALÇIN, E. (1995).
- 543 Effect of valproate and carbamazepine on visual evoked potentials in epileptic children. *Pediatrics*
- 544 *International*, 37(3), 358–361. <https://doi.org/10.1111/j.1442-200X.1995.tb03330.x>
- 545 Zhang, B., Chen, T., Hao, X., Xin, M., & Liang, J. (2023). *Electroclinical characteristics of photosensitive*
- 546 *epilepsy : A retrospective study of 31 Chinese children and literature review*. March.
- 547 <https://doi.org/10.3389/fped.2023.994817>

548  
549  
550



| Patient ID          | Electroclinical details |               |              |                       |
|---------------------|-------------------------|---------------|--------------|-----------------------|
|                     | Sex                     | ILAE syndrome | ILAE Subtype | ASMs                  |
| <b>PSE Type IV</b>  |                         |               |              |                       |
| 1                   | F                       | GGE           | EEM          | LEV                   |
| 2                   | F                       | GGE           | IGE          | LEV; PER              |
| 3                   | F                       | GGE           | JME          | -                     |
| 13                  | F                       | GGE           | GTCS         | -                     |
| 16                  | F                       | GGE           | JME          | -                     |
| 17                  | F                       | GGE           | EEM          | LTG                   |
| 30                  | F                       | GGE           | GTCS         | -                     |
| 34                  | F                       | GGE           | CAE          | -                     |
| 39                  | F                       | GGE           | EEM          | LTG; LEV; PER;<br>CLB |
| 44                  | F                       | GGE           | JME          | TPM                   |
| 52                  | F                       | GGE           | JME          | LTG; ZNS              |
| 53                  | F                       | GGE           | UC           | LEV                   |
| 54                  | M                       | UC            | -            | LTG                   |
| 72                  | F                       | UC            | -            | -                     |
| 76                  | F                       | UC            | -            | -                     |
| 77                  | F                       | GGE           | JME          | -                     |
| 78                  | F                       | GGE           | JME          | LTG                   |
| 79                  | F                       | UC            | -            | LTG                   |
| 81                  | F                       | GGE           | IGE          | ETS                   |
| 82                  | F                       | GGE           | JME          | ETS                   |
| <b>PSE Type III</b> |                         |               |              |                       |
| 5                   | F                       | GGE           | GTCS         | LTG                   |
| 7                   | F                       | GGE           | JME          | VPA                   |
| 14                  | F                       | CM            | DS           | -                     |
| 31                  | M                       | GGE           | EEM          | VPA                   |
| 33                  | F                       | GGE           | JAE          | VPA                   |
| 42                  | F                       | FE            | UC           | LEV                   |
| 51                  | F                       | GGE           | JME          | LEV                   |
| 67                  | F                       | UC            | -            | -                     |
| 70                  | M                       | UC            | -            | ETS; VPA              |
| 73                  | F                       | GGE           | JME          | LTG; VPA              |
| 74                  | F                       | GGE           | JME          | LEV                   |
| 83                  | F                       | GGE           | JAE          | LEV                   |
| 89                  | F                       | GGE           | EEM          | LEV                   |
| 90                  | F                       | FE            | UC           | OXC                   |
| <b>PSE Type II</b>  |                         |               |              |                       |
| 8                   | F                       | FE            | UC           | LTG                   |
| 9                   | F                       | FE            | UC           | LEV                   |
| 11                  | F                       | GGE           | GTCS         | -                     |
| 15                  | F                       | GGE           | JME          | LTG                   |
| 18                  | F                       | FE            | -            | LEV                   |



|            |   |     |       |               |
|------------|---|-----|-------|---------------|
| 19         | F | GGE | IGE   | ETS           |
| 20         | F | UC  | -     | -             |
| 32         | F | UC  | -     | -             |
| 69         | F | GGE | JME   | LEV           |
| 87         | F | UC  | -     | VPA           |
| 88         | M | FE  | ST    | OXC           |
| <b>PWE</b> |   |     |       |               |
| 21         | F | GGE | IGE   | LEV           |
| 24         | M | FE  | UC    | LEV           |
| 25         | F | FE  | UC    | LTG; LEV      |
| 26         | F | FE  | UC    | PER; CLB; LCM |
| 28         | F | GGE | IGE   | -             |
| 29         | F | GGE | JAE   | LTG; ETS      |
| 37         | F | GGE | JME   | LEV           |
| 38         | F | UC  | -     | OXC; PHT      |
| 40         | F | GGE | EEM   | LEV           |
| 41         | M | UC  | -     | VPA           |
| 43         | M | FE  | Fr, P | LEV; CBZ      |
| 45         | F | FE  | UC    | LTG; LEV      |
| 46         | F | GGE | JAE   | -             |
| 47         | F | UC  | -     | -             |
| 48         | F | FE  | ST    | LEV           |
| 49         | F | GGE | JAE   | -             |
| 50         | F | FE  | T     | OXC; LEV      |
| 68         | F | UC  | ST    | -             |
| 86         | M | GGE | UC    | LEV           |

551  
 552 **Table 1.: Electroclinical details and demographics of the patient groups.**  
 553 ASM = antiseizure medication; CAE = childhood absence epilepsy; CBZ = carbamazepine; CLB = clobazam; CM =  
 554 combined; DS = doose syndrome; ETS = etosuccimide; EEM = eyelid myoclonia; F = female; Fr = frontal; FE = focal  
 555 epilepsy; GGE= genetic generalized epilepsies; GTCS = generalized tonic clonic seizures; IGE = idiopathic generalized  
 556 epilepsy; ILAE = International League Against Epilepsy JAE = juvenile absence epilepsy; JME = juvenile myoclonic  
 557 epilepsy; LCM = lacosamide; LEV = levetiracetam; LTG = lamotrigine; M = male; OXC = oxcarbamazepine; P = parietal;  
 558 PER = Perampanel; PHT = phenytoin; PWE = Patients with epilepsy; ST= structural; T = temporal; TPM = topiramate;  
 559 UC = unclear; VPA = valproate; ZNS = zonisamide  
 560

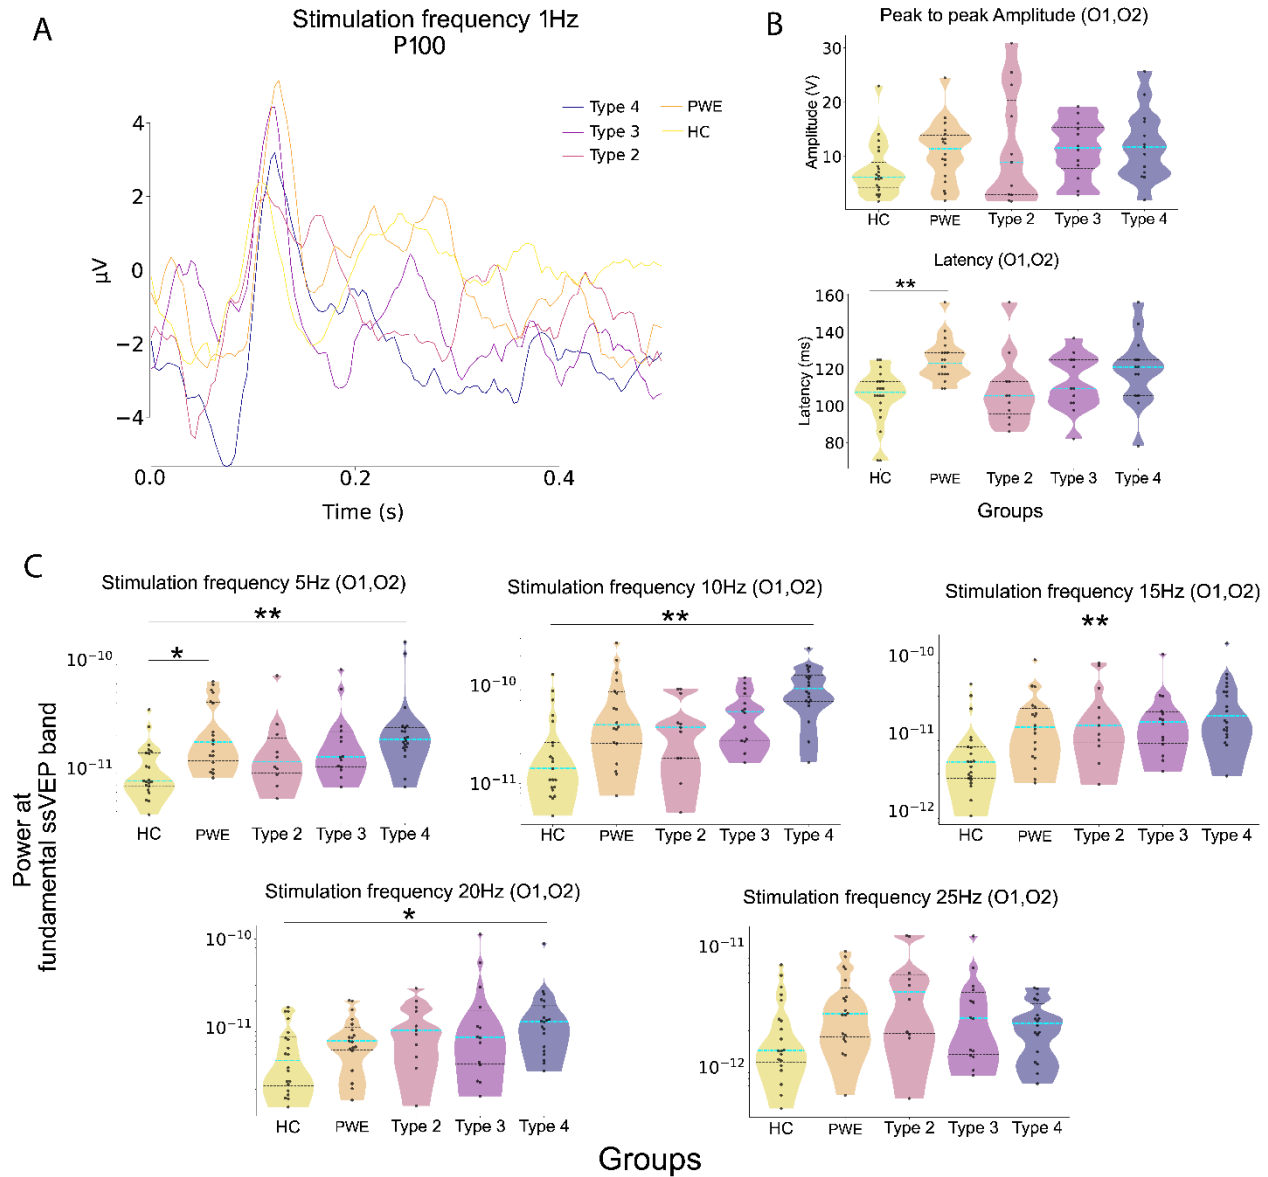

561

562 **Figure 1.: P100 and ssVEP characteristics for different stimulation frequencies.** (A) Group averages of the P100  
563 amplitude in response to 1 Hz stimulation frequency per group. (B) Violin plots show the peak-to-peak amplitude and  
564 latency of the P100 response. No significant differences in amplitude appear (top). PWE shows significantly longer  
565 latency (bottom) compared to HC. (C) Violin plots display the log-transformed absolute power of the fundamental  
566 ssVEP at occipital electrodes (O1, O2) under the five stimulation frequencies of interest. Significant differences  
567 compared to HC are apparent in Type 4, which shows heightened activity for almost all stimulation frequencies. PWE  
568 also showed significantly increased power compared to HC for stimulation frequency 5 Hz. Blue lines show the  
569 median, while the thinner black lines represent the lower and upper quartiles of the data. Individuals are represented  
570 as dots. Statistical significance is represented as \* $p \leq 0.05$ , \*\* $p \leq 0.01$  and \*\*\* $p \leq 0.001$ .

It is made available under a [CC-BY-ND 4.0 International license](https://creativecommons.org/licenses/by-nd/4.0/).

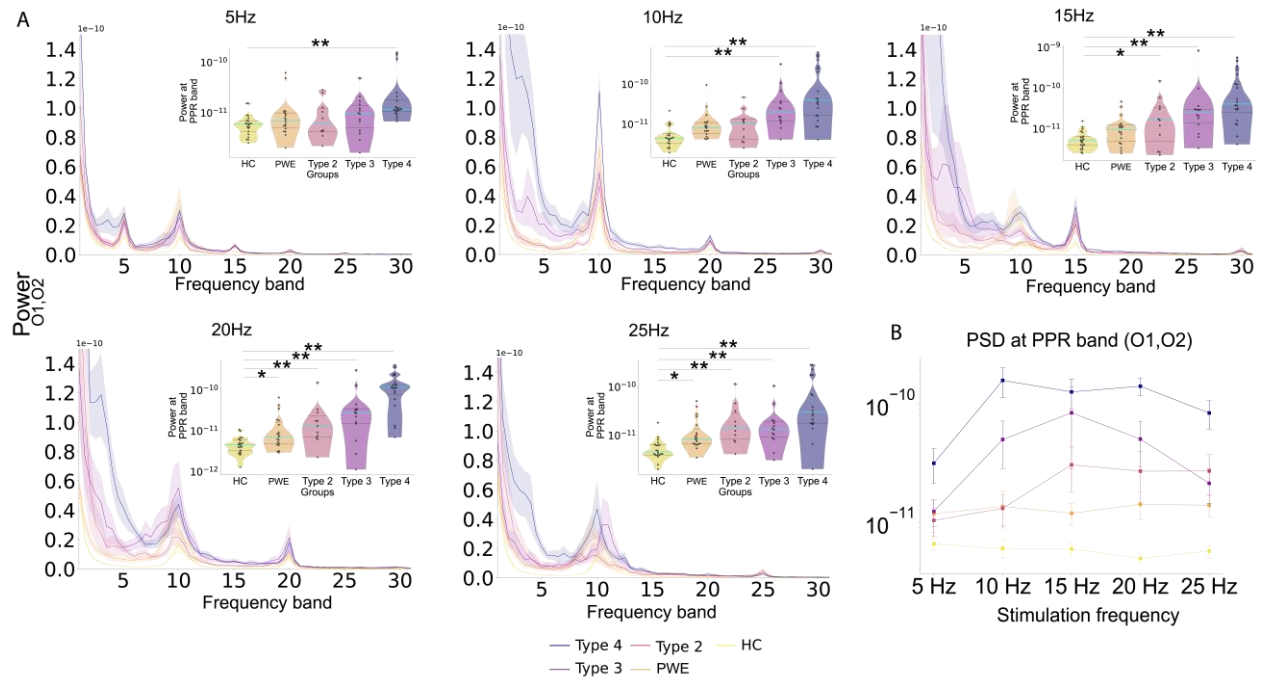

571

572 **Figure 2.: Power differences.** (A) Power spectral densities (PSDs) displayed at each stimulation frequency averaged  
573 per group at occipital electrodes (O1, O2). PSDs show power fluctuations at the bands linked to the triggering  
574 frequency and the pathological PPR activity between 3-4 Hz (PPR band) of PSE patients. The shaded area shows the  
575 standard error corresponding to each group's average. Stimulation frequency-specific PPRs are further displayed on  
576 the violin plots, showing a gradual increase with type severity for stimulation frequencies 10, 15, 20, and 25 Hz. Blue  
577 lines show the median while the thinner black lines represent the lower and upper quartiles of the data. Individuals  
578 are represented as dots. (B) The line plot displays the average power, with standard error, for all. It shows an increase  
579 in PPR activity for at stimulation frequencies that were previously shown to be high risk (10, 15, and 20 Hz) and a still  
580 high but decreasing PPR for 25 Hz. Both the violin plots and the line plot show log-transformed values.

581

582

It is made available under a [CC-BY-ND 4.0 International license](https://creativecommons.org/licenses/by-nd/4.0/) .

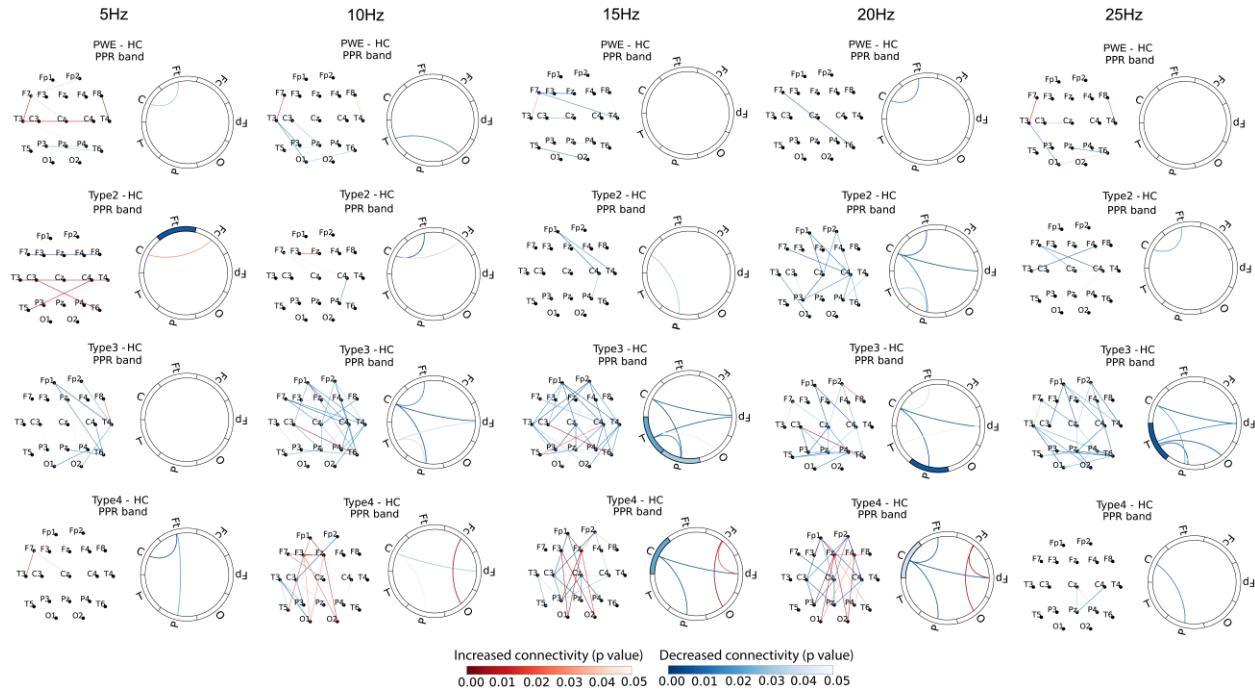

583

584 **Figure 3: FC patterns in comparison to HC.** Significant FC patterns are shown channel (top plots) and region-wise  
585 (spider plots) for all five stimulation frequencies. The red color indicates increased, while the blue color indicates  
586 decreased connectivity in patients compared to HC. This was calculated by subtracting HC from the respective patient  
587 group (PWE, 2, 3, and 4). The shade of the colors corresponds to the level of significance, with darker colors indicating  
588 higher significance. In the case of a significant within-region connectivity difference, the level of significance and the  
589 nature of change (decrease, increase) are indicated by the colored in sections at the corresponding region of the  
590 spider plot. Hyperconnectivity shows an increase with type severity between occipital and frontal and within frontal  
591 regions, mainly in the case of Type 4, but some patterns are noticeable in Type 3 as well. Hypoconnectivity is present  
592 between central and parietal and central and frontopolar regions in all PSE types compared to HC.

593
